# Supplementary material for: Angle-resolved optical spectroscopy of photonic cellulose nanocrystal films reveals the influence of additives on the mechanism of kinetic arrest
Source: Royal Society of Chemistry journal article supplement (doi:10.1039/d4sm00155a), 2024-01-01
Supplement: d4sm00155a1.pdf [file d4sm00155a1.pdf]

1 **Supplementary Materials for:**

2 **Angle-resolved optical spectroscopy of photonic cellulose nanocrystal films reveals the**  
3 **influence of additives on the mechanism of kinetic arrest.**

4

5 Thomas G. Parton, Richard M. Parker, Sonja Osbild, Silvia Vignolini\* and Bruno Frka-Petesic\*

6 \* [silvia.vignolini@mpikg.mpg.de](mailto:silvia.vignolini@mpikg.mpg.de)

7 \* [bf284@cam.ac.uk](mailto:bf284@cam.ac.uk)

8

9

10 **Contents**

|    |                                                                                               |    |
|----|-----------------------------------------------------------------------------------------------|----|
| 11 | S01 Discussion of different concentration metrics .....                                       | 2  |
| 12 | S02 Pitch compression plot.....                                                               | 5  |
| 13 | S03 TEM size distributions .....                                                              | 6  |
| 14 | S04 Micro-spectroscopy for photonic films prepared with H-CNCs and added NaCl.....            | 9  |
| 15 | S05 SEM cross-sections for photonic films prepared with H-CNCs and NaCl.....                  | 10 |
| 16 | S06 Origins of the features in the AROS data .....                                            | 11 |
| 17 | S07 Conductometric titration .....                                                            | 12 |
| 18 | S08 POM and AROS for photonic films prepared with Na-CNCs and added NaCl.....                 | 13 |
| 19 | S09 POM and AROS for photonic films prepared with H-CNCs and added CaCl <sub>2</sub> .....    | 14 |
| 20 | S10 Rationalising the concurrent effects of added ions on CNC self-assembly.....              | 15 |
| 21 | S11 Modified compression model .....                                                          | 16 |
| 22 | S12 Comparison of literature data for additive-induced red-shifts in photonic CNC films ..... | 18 |

23

24

## 25 S01 Discussion of different concentration metrics

26 This section provides an overview of different expressions for the concentration of species in a  
27 colloidal dispersion. Consider a system containing CNC, water, an additive in the CNC dispersion  
28 (da) and an additive that is not in the CNC dispersion (na). Depending on the circumstances, it is  
29 convenient to either consider the concentration of each species relative to the total system (including  
30 all four components), the colloidal dispersion (excluding the undissolved additive) or solution (only  
31 the water and dissolved additive). These three cases are illustrated in **Fig. S1**, and the system volume  
32 is each case is

$$33 \quad V_{\text{tot}} = V_{\text{CNC}} + V_{\text{wat}} + V_{\text{da}} + V_{\text{na}} \quad (1)$$

$$34 \quad V_{\text{dis}} = V_{\text{CNC}} + V_{\text{wat}} + V_{\text{da}} \quad (2)$$

$$35 \quad V_{\text{sol}} = V_{\text{wat}} + V_{\text{da}} \quad (3)$$

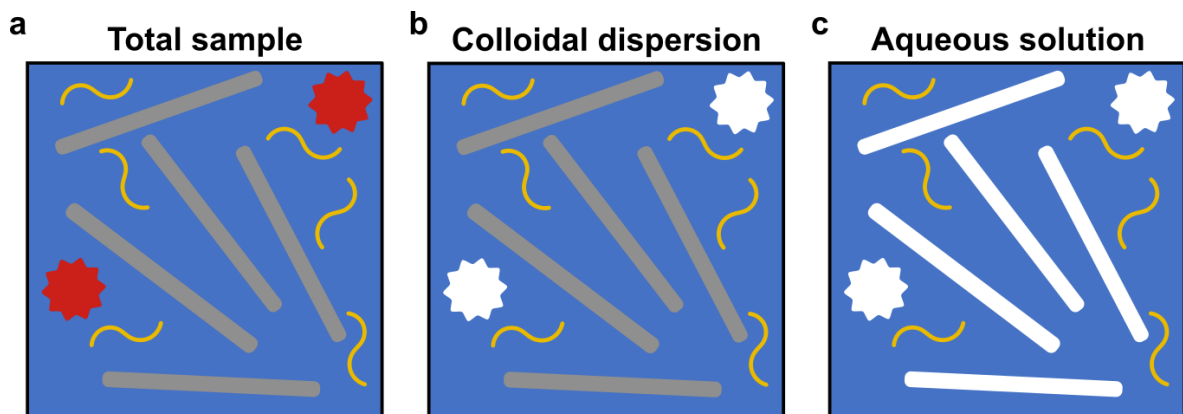

37 **Fig. S1** Illustration (not to scale) representing the different components of the sample: the CNCs (grey rods), dissolved  
38 additive (orange lines), undissolved additive (red stars) and water (blue). Within the total sample (a), the colloidal dispersion  
39 (b) comprises all components in the aqueous phase (CNCs, dissolved additive and water, as shown in colour in b). In  
40 contrast, the aqueous solution (c) comprises only the water and dissolved additive.

41 First, the concentration can be expressed as a proportion of the total sample mass or volume, in  
42 terms of volume fraction

$$43 \quad \Phi_i = V_i/V_{\text{tot}} \quad (4)$$

44 or mass fraction

45 
$$w_i = \frac{m_i}{m_{\text{tot}}} = \frac{\rho_i V_i}{\sum_j \rho_j V_j} \quad (5)$$

46 In general, the volume fraction can be calculated from the mass fraction (and vice versa) if the  
 47 composition of the sample and the density of each component is known. In particular, for a binary  
 48 mixture of materials  $a$  and  $b$  (where  $\Phi_a + \Phi_b = 1$  and  $w_a + w_b = 1$ ) the volume and mass fractions  
 49 are related by

50 
$$w_a = \frac{\rho_a \Phi_a}{\rho_a \Phi_a + \rho_b (1 - \Phi_a)} \quad (6)$$

51 
$$\Phi_a = \frac{\rho_a^{-1} w_a}{\rho_a^{-1} w_a + \rho_b^{-1} (1 - w_b)} \quad (7)$$

52 Eq. 7 is used to estimate the CNC volume fraction of the initial stock suspensions by  
 53 thermogravimetric analysis (see Experimental Methods of the main text).

54 If the sample contains non-dispersed additive ( $V_{na} \neq 0$ ), the effective concentrations within the  
 55 dispersion can be defined. In the main text, the effective volume fraction of species  $i$  is used, which  
 56 is given by

57 
$$\tilde{\Phi}_i = V_i / V_{\text{dis}}. \quad (8)$$

58 Finally, if the additive is an ionic species  $i$ , it is useful to consider its molar concentration  $c_i$  (mol/L) or  
 59 mass concentration  $\gamma_i$  (g/L) in the aqueous solution. The molar concentration of a given species  $i$  in  
 60 a solution is given by

61 
$$c_i = \frac{N_i}{V_{\text{sol}}}, \quad (9)$$

62 where  $N_i$  is the number of moles of  $i$ . Similarly, the mass concentration of  $i$  is

63 
$$\gamma_i = \frac{m_i}{V_{\text{sol}}}, \quad (10)$$

64 where  $m_i$  is the total mass of  $i$  in the solution. The two concentrations are related by  $\gamma_i = M_i c_i$  where  
 65  $M_i$  is the molar mass of  $i$ .

66

67 As the concentrations of the initial CNC suspension and electrolyte solutions used for mixing are  
68 determined gravimetrically (i.e., by mass), the ion:CNC ratio can be directly calculated from  
69 experimental data as a mass ratio

70 
$$\mu_i = \frac{m_i}{m_{\text{CNC}}} \quad (11)$$

71 which can then be used to estimate the ion:CNC volume ratio

72 
$$v_i = \frac{V_i}{V_{\text{CNC}}} = \mu_i \frac{\rho_{\text{CNC}}}{\rho_i} \quad (12)$$

73 where  $\rho_{\text{CNC}}$  and  $\rho_i$  are the mass densities of CNC and ion salt, respectively. However, to compare  
74 different ionic species, it is most convenient to express this ratio in terms of moles of added ions per  
75 CNC dry mass,

76 
$$\hat{c}_i = \frac{N_i}{m_{\text{CNC}}} = \frac{\mu_i}{M_i}, \quad (13)$$

77 where  $M_i$  is the molar mass.

78 The absolute concentration of added ions in aqueous solution at a given CNC concentration,  $c_i$ , is  
79 given by

80 
$$c_i = \frac{N_i}{V_{\text{sol}}} = \frac{\hat{c}_i \rho_{\text{CNC}}}{v_{\text{wat}} + v_i}. \quad (14)$$

81 where  $V_{\text{sol}}$  is the volume of the solution (i.e., excluding the volume occupied by the CNCs), and  $v_{\text{wat}}$   
82 is the water:CNC volume ratio. As the volume of ions is negligible,  $v_i \approx 0$ ,  $\Phi_{\text{CNC}} = (1 + v_{\text{wat}})^{-1}$ , and  
83 the molar concentration of ions in solution is given by

84 
$$c_i = \frac{\rho_{\text{CNC}} \Phi_{\text{CNC}}}{1 - \Phi_{\text{CNC}}} \hat{c}_i. \quad (15)$$

85

86 **S02 Pitch compression plot**

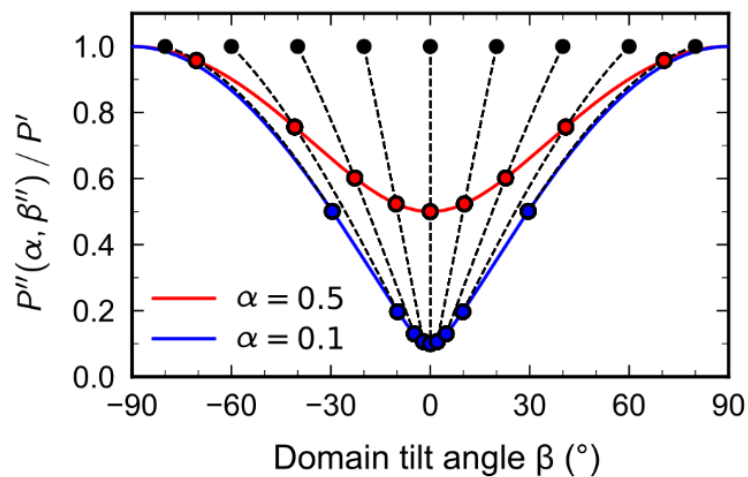

87

88 **Fig. S2** Relative change in pitch with final domain tilt angle  $P''(\alpha, \beta'') / P'$ , given by Eqs. 2 and 3 of the main text. Curves  
89 are shown for  $\alpha = 0.5$  (red) and  $\alpha = 0.1$  (blue). Black dotted lines indicate the evolution in  $P''(\alpha, \beta'') / P'$  with decreasing  $\alpha$   
90 for fixed initial tilt angle  $\beta'$ .

91

92

### 93 **S03 TEM size distributions**

94 For transmission electron microscopy (TEM), a dilute CNC suspension (approx. 0.001 wt%) was  
95 prepared in an aqueous solution of sulfuric acid (10 mM), and carbon-coated copper TEM grids  
96 (AGS160-3, Agar Scientific) were glow-discharged (Quorum GloQube, 25 mA current, <0.1 mbar  
97 vacuum). A 4  $\mu$ L droplet of the CNC suspension was then deposited onto the grid for 120 seconds,  
98 before blotting away the excess liquid using filter paper. A 4  $\mu$ L droplet of 2 wt% uranyl acetate solution  
99 was then deposited onto the grid for 90 seconds before blotting. The grid was then left to dry in air.

100 TEM was performed using a Talos F200X G2 microscope (Thermo Scientific FEI Company) at 200 kV  
101 and images were acquired using a CMOS camera (Ceta 4k x 4k). An example image is shown in  
102 **Fig. S3a**.

103 The morphological properties of the CNCs were obtained as previously described.<sup>1</sup> Briefly, the  
104 outlines of 160 negatively-stained CNCs were manually traced in ImageJ to produce a binary image  
105 (**Fig. S3b**), from which the basic morphological properties were extracted automatically using the  
106 Shape Filter plugin.<sup>2</sup> Any isolated object in the TEM was assumed to be a single CNC particle,  
107 including those that could be interpreted as two overlapping rod-like particles.

108 The irregular shape of CNCs permits many possible definitions of their length, width etc. From  
109 oriented bounding boxes drawn around the particles (exemplified in **Fig. S3b**), histograms were  
110 obtained for the box length  $L_b$  (**Fig. S3c**), box width  $W_b$  (**Fig. S3d**) and corresponding aspect ratio  
111  $a_b = L_b/W_b$  (**Fig. S3e**). Using the true particle area  $A$ , (**Fig. S3f**), the area-equivalent width  
112  $W_{AE} = A/L_b$  (**Fig. S3g**) and corresponding aspect ratio  $a_{AE} = L_b/W_{AE}$  (**Fig. S3h**) can also be  
113 defined. CNCs exhibit considerable polydispersity in size, typically following a log-normal distribution.  
114 For each morphological property  $Z$ , **Table S1** shows the mean and standard deviation, as well as the  
115 log mean and log standard deviation (i.e. mean and standard deviation for  $\ln Z$  in the units shown in  
116 the first column).

117

118

| <b>Property</b>              | <b>Mean</b> | <b>Standard deviation</b> | <b>Log mean</b> | <b>Log standard deviation</b> |
|------------------------------|-------------|---------------------------|-----------------|-------------------------------|
| Box length (nm)              | 139         | 102                       | 4.72            | 0.64                          |
| Box width (nm)               | 26          | 21                        | 3.01            | 0.70                          |
| Box aspect ratio             | 6.07        | 2.72                      | 1.71            | 0.42                          |
| Area (nm <sup>2</sup> )      | 2410        | 2980                      | 7.21            | 1.09                          |
| Area-equivalent width (nm)   | 13.7        | 7.2                       | 2.49            | 0.52                          |
| Area-equivalent aspect ratio | 10.2        | 4.9                       | 2.23            | 0.43                          |

119

**Table S1** Statistics for morphological properties obtained from 160 CNC outlines in TEM images.

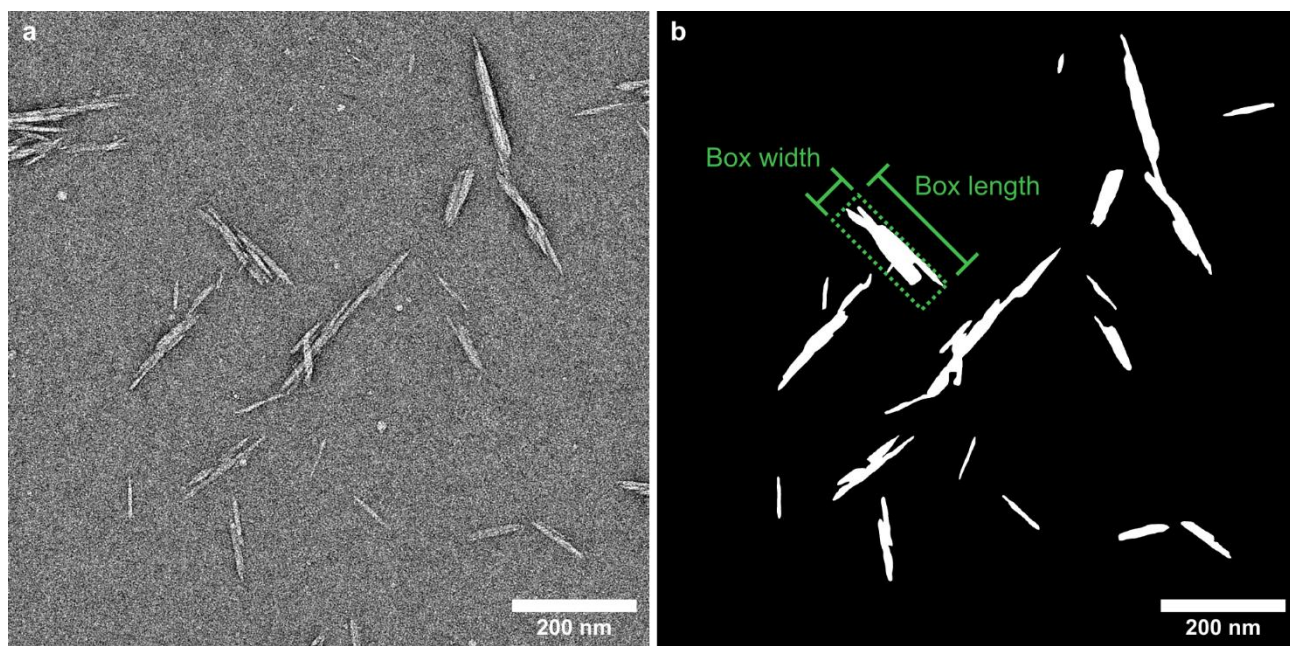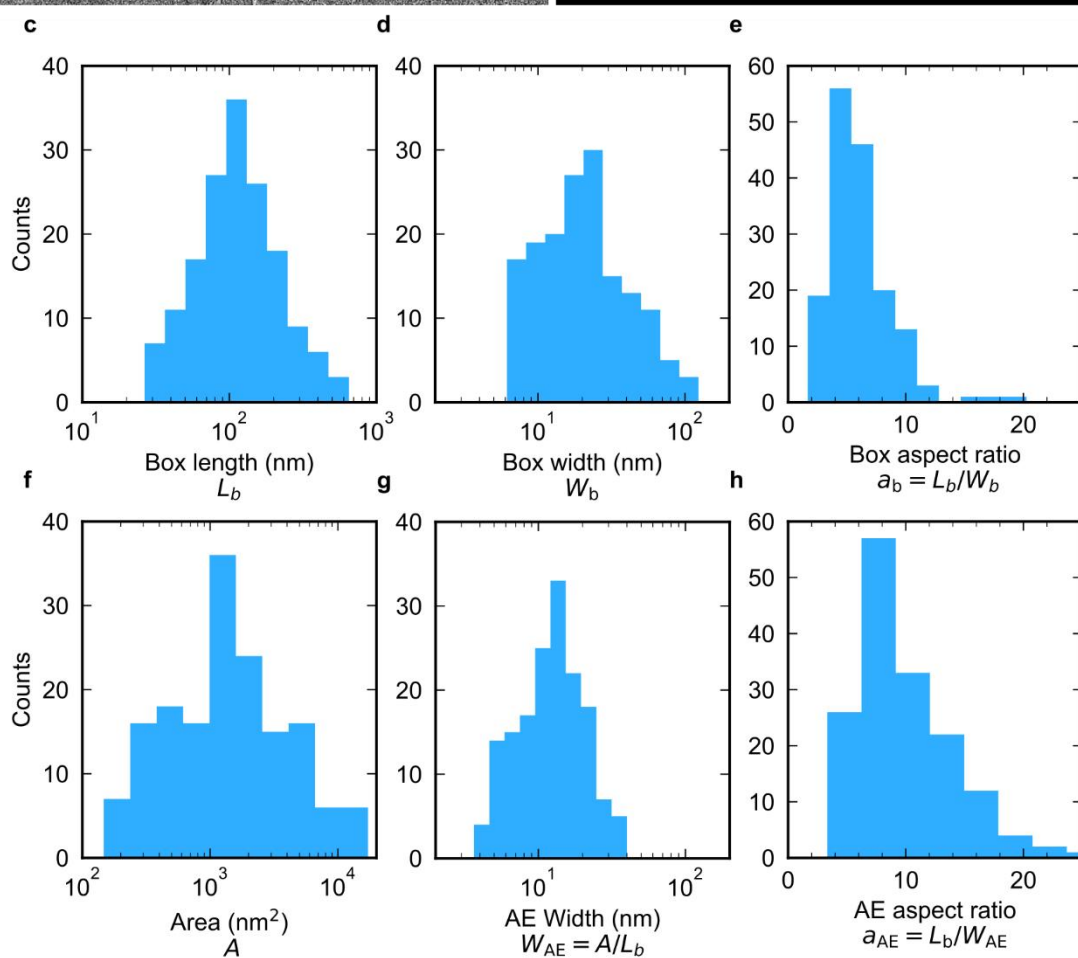

120

121 **Fig. S3** (a) Example TEM image of negatively-stained CNCs. (b) Binary image obtained from (a) by manual tracing of

122 particle outlines. Green annotations show the definition of the oriented bounding box for an example outline. (c-h)

123 Histograms for the key morphological properties listed in **Table S1**.

124



125 **S04 Micro-spectroscopy for photonic films prepared with H-CNCs and added NaCl**

126 Micro-spectroscopy was performed alongside the polarised optical microscopy described in the main  
127 text. One end of an optical fibre (Avantes FC-UV600-2-SR, core diameter 600  $\mu\text{m}$ ) was positioned in  
128 the confocal image plane of the microscope, while the other end was coupled to a UV-vis  
129 spectrometer (Avantes AvaSpec-HS2048). LCP and RCP reflectance spectra were normalised to the  
130 reflection from a silver mirror (Thorlabs PF10-03-P01) imaged under the corresponding polarisation  
131 conditions.

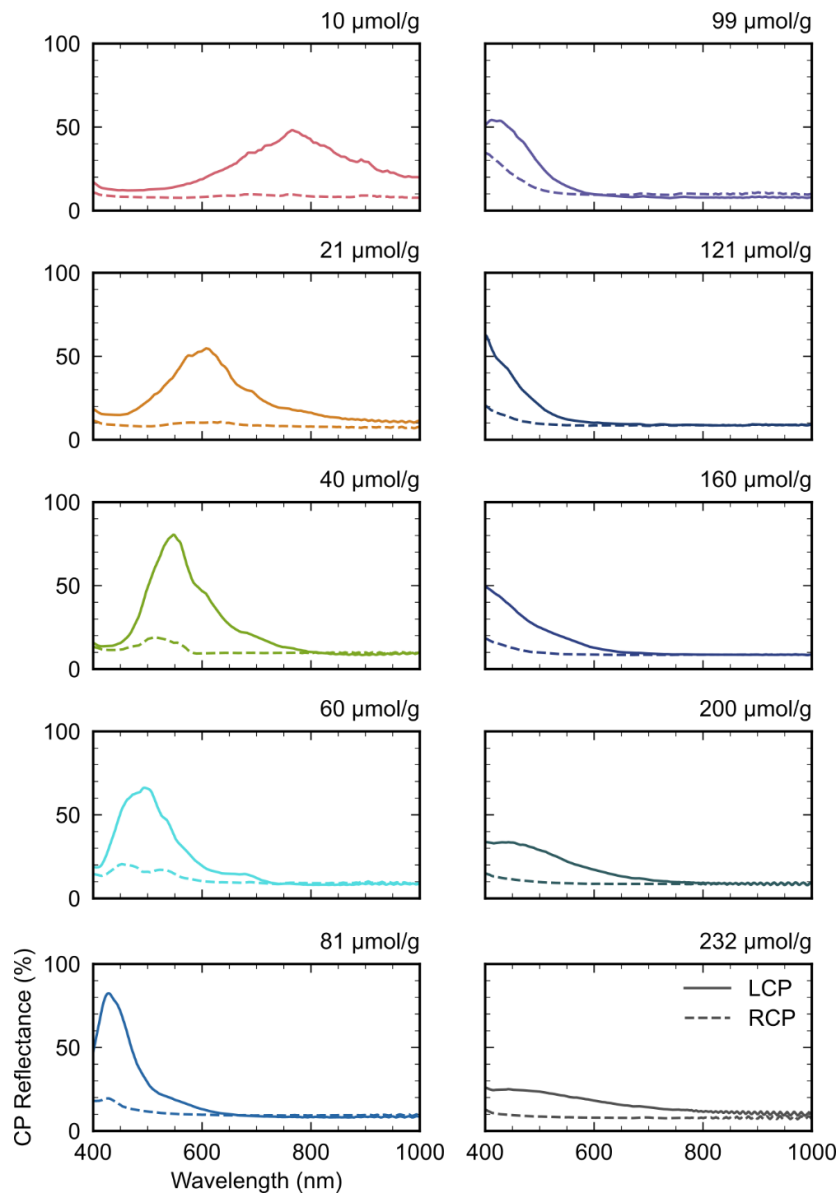

132

133

134 **Fig. S4** Reflectance micro-spectra for selected photonic films prepared using H-CNCs and added NaCl ( $c_{\text{NaCl}} = 0 - 232$   
135  $\mu\text{mol/g}$ ). Solid and dashed lines correspond to LCP and RCP spectra, respectively. Spectra were acquired from the regions  
136 shown in the POM images in **Fig. 3** of the main text.

137 **S05 SEM cross-sections for photonic films prepared with H-CNCs and NaCl**

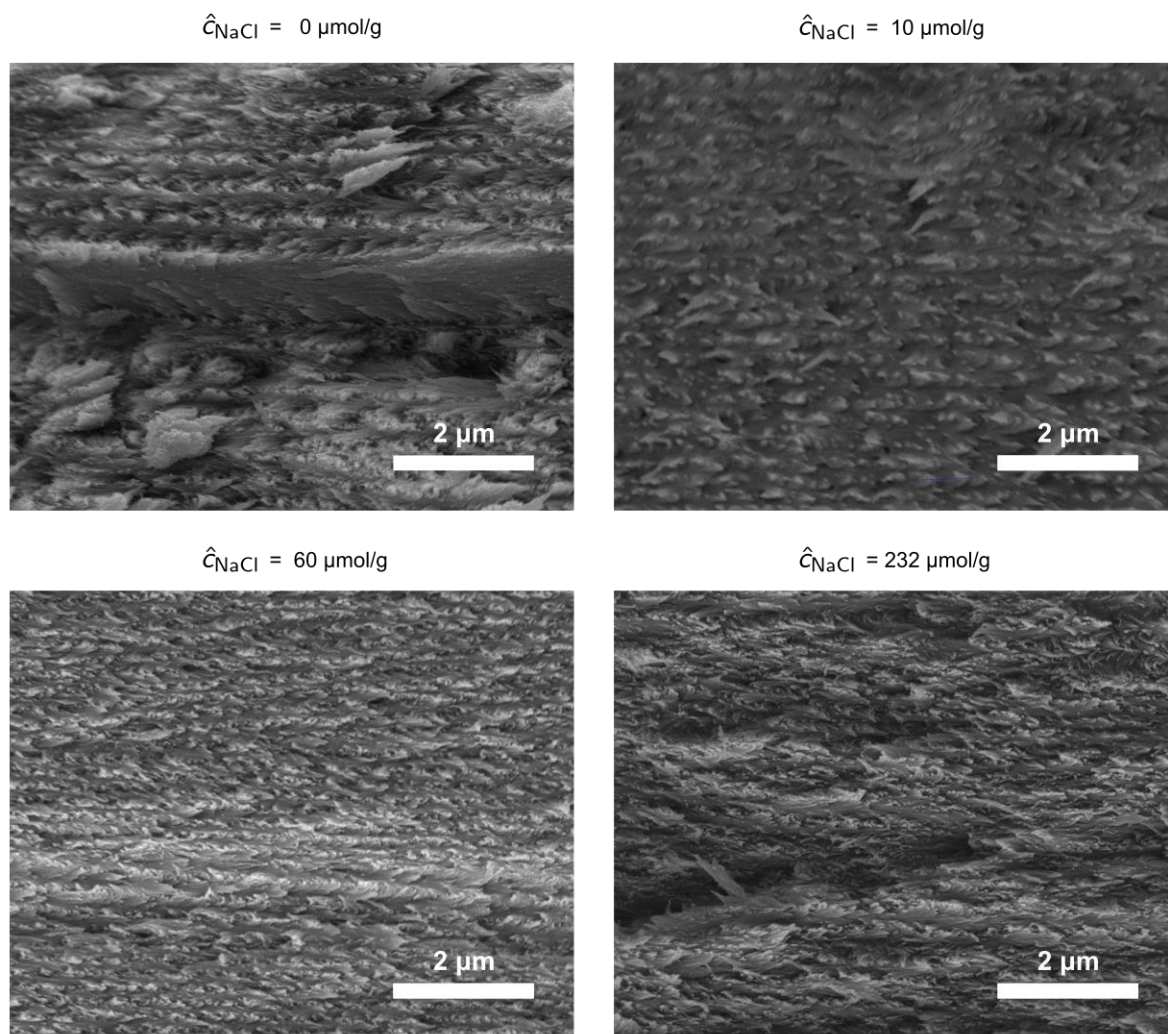

138

139 **Fig. S5** Cross-sectional SEM images for selected photonic films prepared using H-CNCs and NaCl ( $\hat{c}_{NaCl} = 0, 10, 40, 60$   
140 and  $232 \mu\text{mol/g}$ ). The image orientation matches the film, such that the surface normal lies in the vertical direction for each  
141 image. The  $\hat{c}_{NaCl} = 0 \mu\text{mol/g}$  sample has an apparent pitch corresponding to IR reflection, while for other samples the pitch  
142 is generally consistent with the POM and AROS data. Note that pitch increases sharply for tilted domains (most notable in  
143 the image for the  $60 \mu\text{mol/g}$  sample).

144

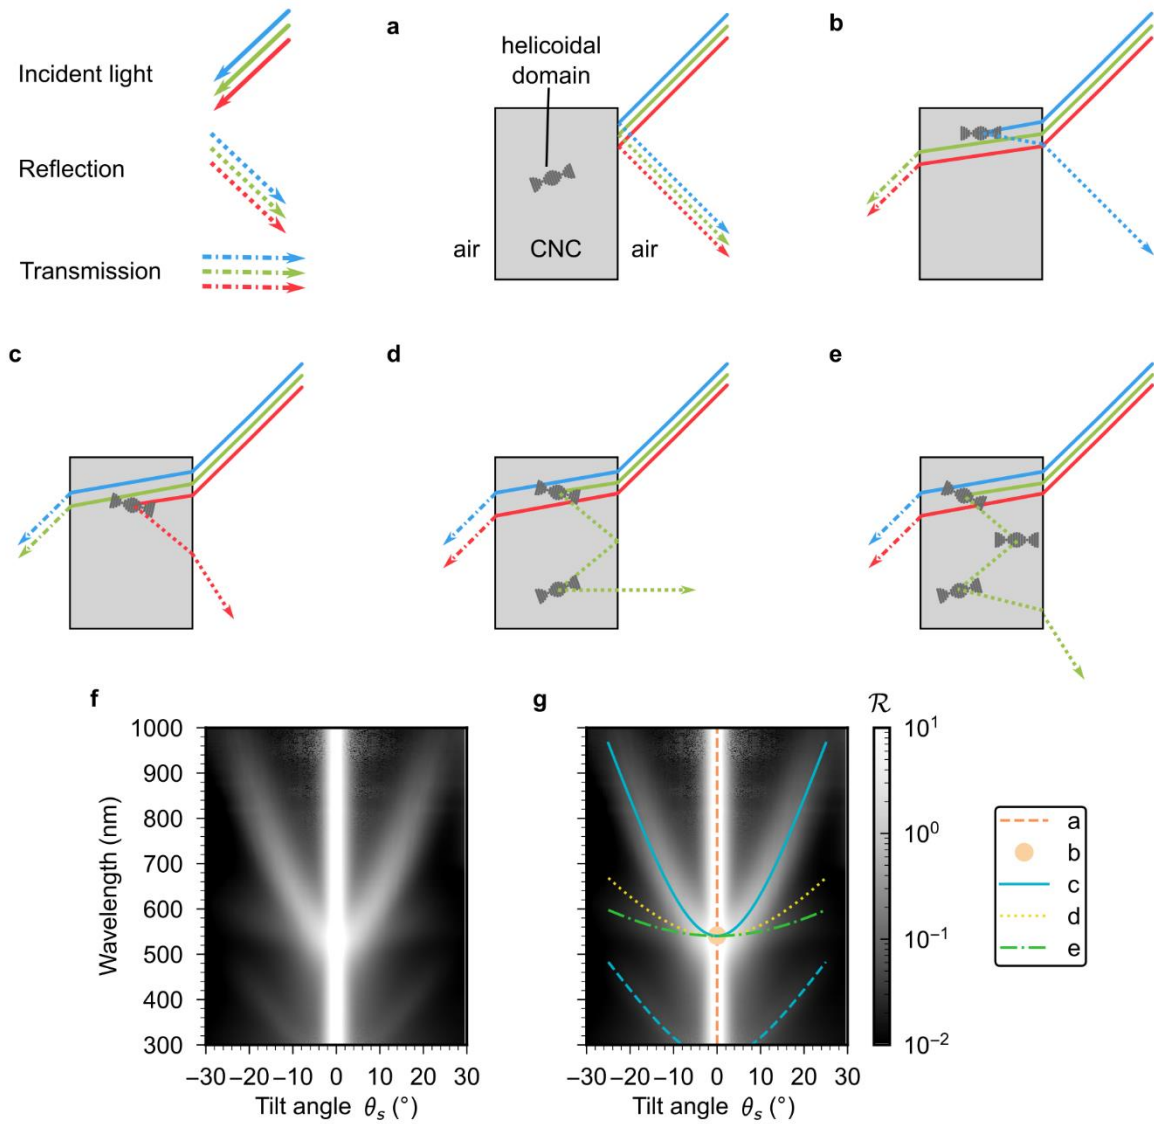

146

147 **Fig. S6** (a-e) Illustrations of possible spectral features in AROS data. (a) Broadband reflection from the air-CNC interface  
 148 due to refractive index contrast (unrelated to any helicoidal ordering). (b) Selective reflection by an aligned helicoidal  
 149 domain. (c) Selective reflection by a tilted helicoidal domain. (d) Reflection from two helicoidal domains via the CNC-air  
 150 interface. (f) AROS data (log-scale reflectance) for a photonic CNC film with  $\lambda_0$   
 151 = 536 nm, exhibiting several spectral features. (g) Data from (f) with lines overlaid corresponding to illustrations (a-e). The  
 152 blue dashed curve corresponds to the second-order ( $\lambda/2$ ) reflection from tilted domains (not represented in d).

153

154

155 **S07 Conductometric titration**

156 Conductometric titration was performed using an automatic titrator (Metrohm 856). The titrand  
157 (47.7 mg CNC dry mass) was prepared by diluting 2.013 g of stock CNC suspension (2.43 wt%) into  
158 200 mL of 0.5 mM NaCl solution. The titration was performed by injecting NaOH solution (10.0 mM)  
159 in 5  $\mu$ L increments using a burette, while continuously recording the suspension conductivity. The  
160 number of sulfate half-esters per CNC dry mass (in  $\mu$ mol/g) was determined from the first equivalence  
161 point of the titration curve using a manual piecewise linear fitting (**Fig. S7**).

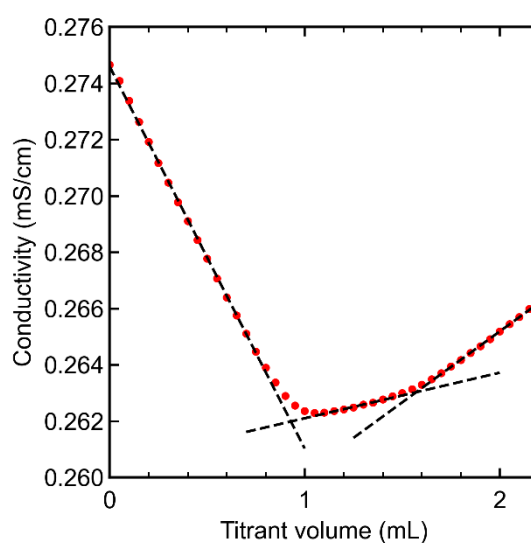

162

163 **Fig. S7** Conductometric titration of H-CNC suspension against base solution. The first equivalence point at 0.93 mL  
164 corresponds to a CNC surface charge of 196  $\mu$ mol/g.

165

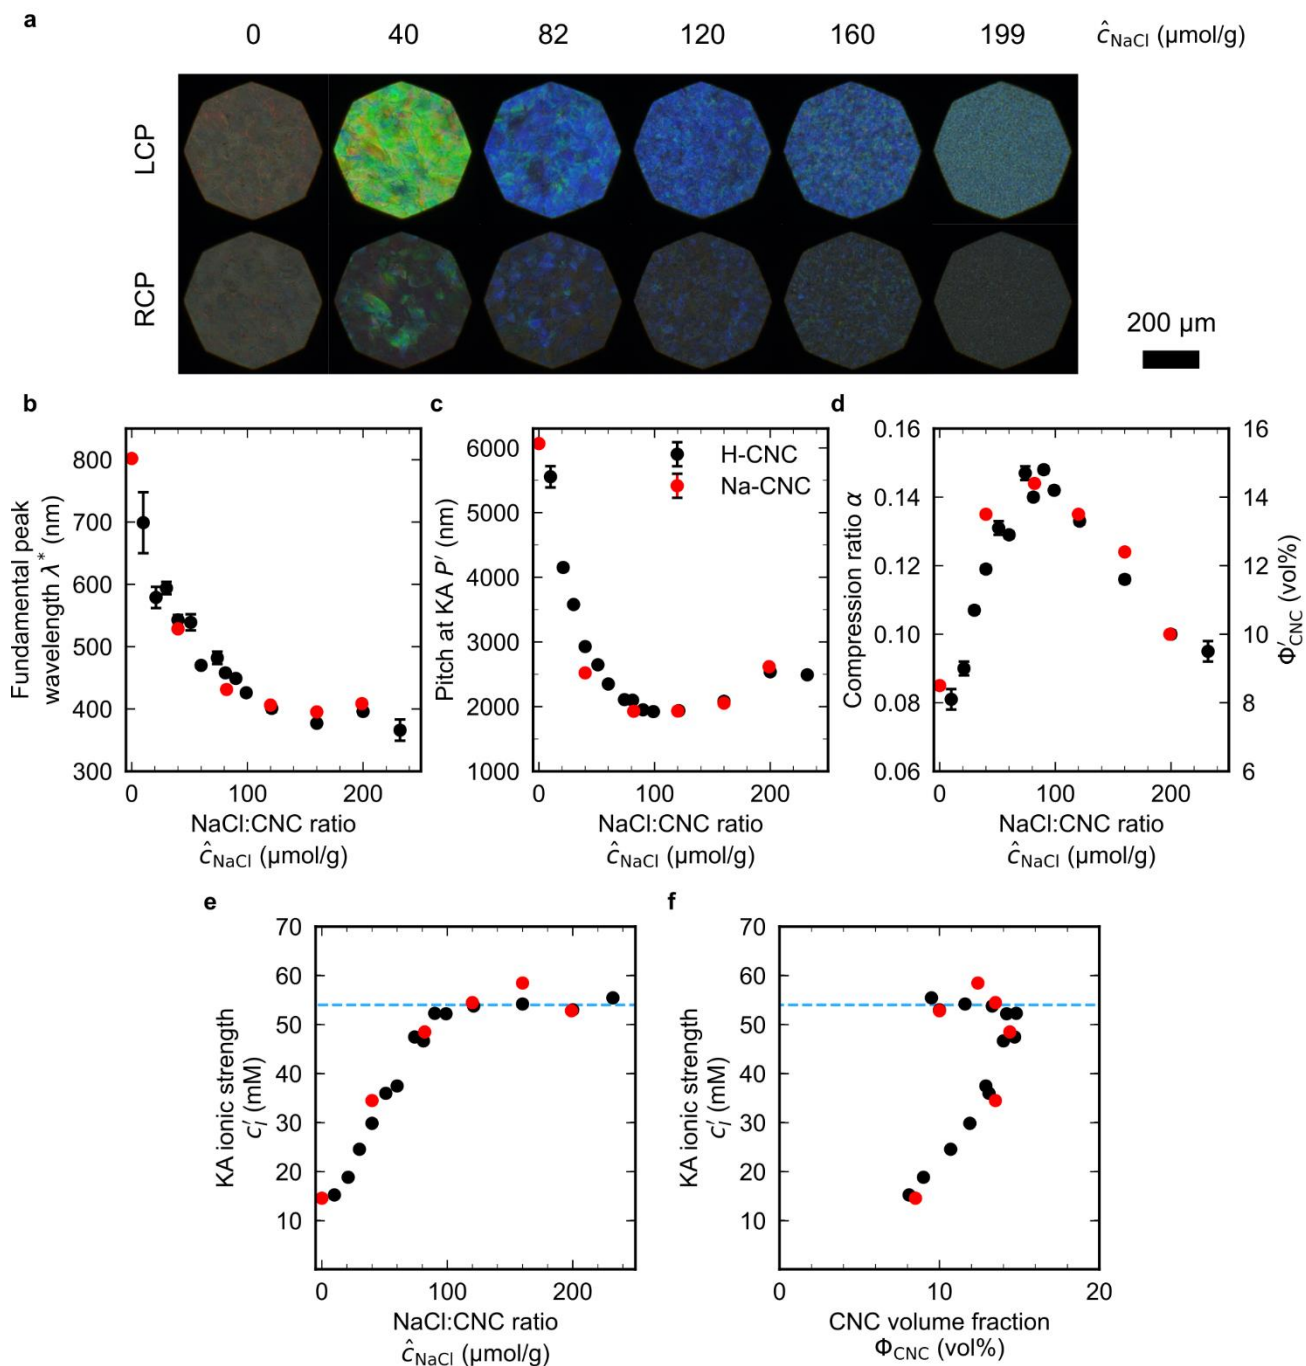

167

168 **Fig. S8** POM and AROS for photonic films prepared with Na-CNCs and NaCl. The original H-CNC suspension (2.37 wt%)  
 169 was neutralised using 10 mM NaOH solution. Due to the lower concentration of the resulting Na-CNC suspension  
 170 (1.26 wt%), films were cast using 6.0 mL of 1.0 wt% suspension (rather than 3.0 mL of 2.0 wt% suspension, as used for all  
 171 other films). (a) POM images of photonic CNC films with  $\hat{c}_{\text{NaCl}}$  for Na-neutralised suspension (Na-CNC). (b-d) AROS fitting  
 172 parameters for the Na-CNC films (red), which show very similar trends to the H-CNC series from the main text (black). (e)  
 173 Ionic strength at KA,  $c'_i$ , versus  $\hat{c}_{\text{NaCl}}$ . (f)  $c'_i$  versus  $\Phi'_{\text{CNC}}$ . Blue dashed lines correspond to  $c'_i = 54$  mM, as in the main text.

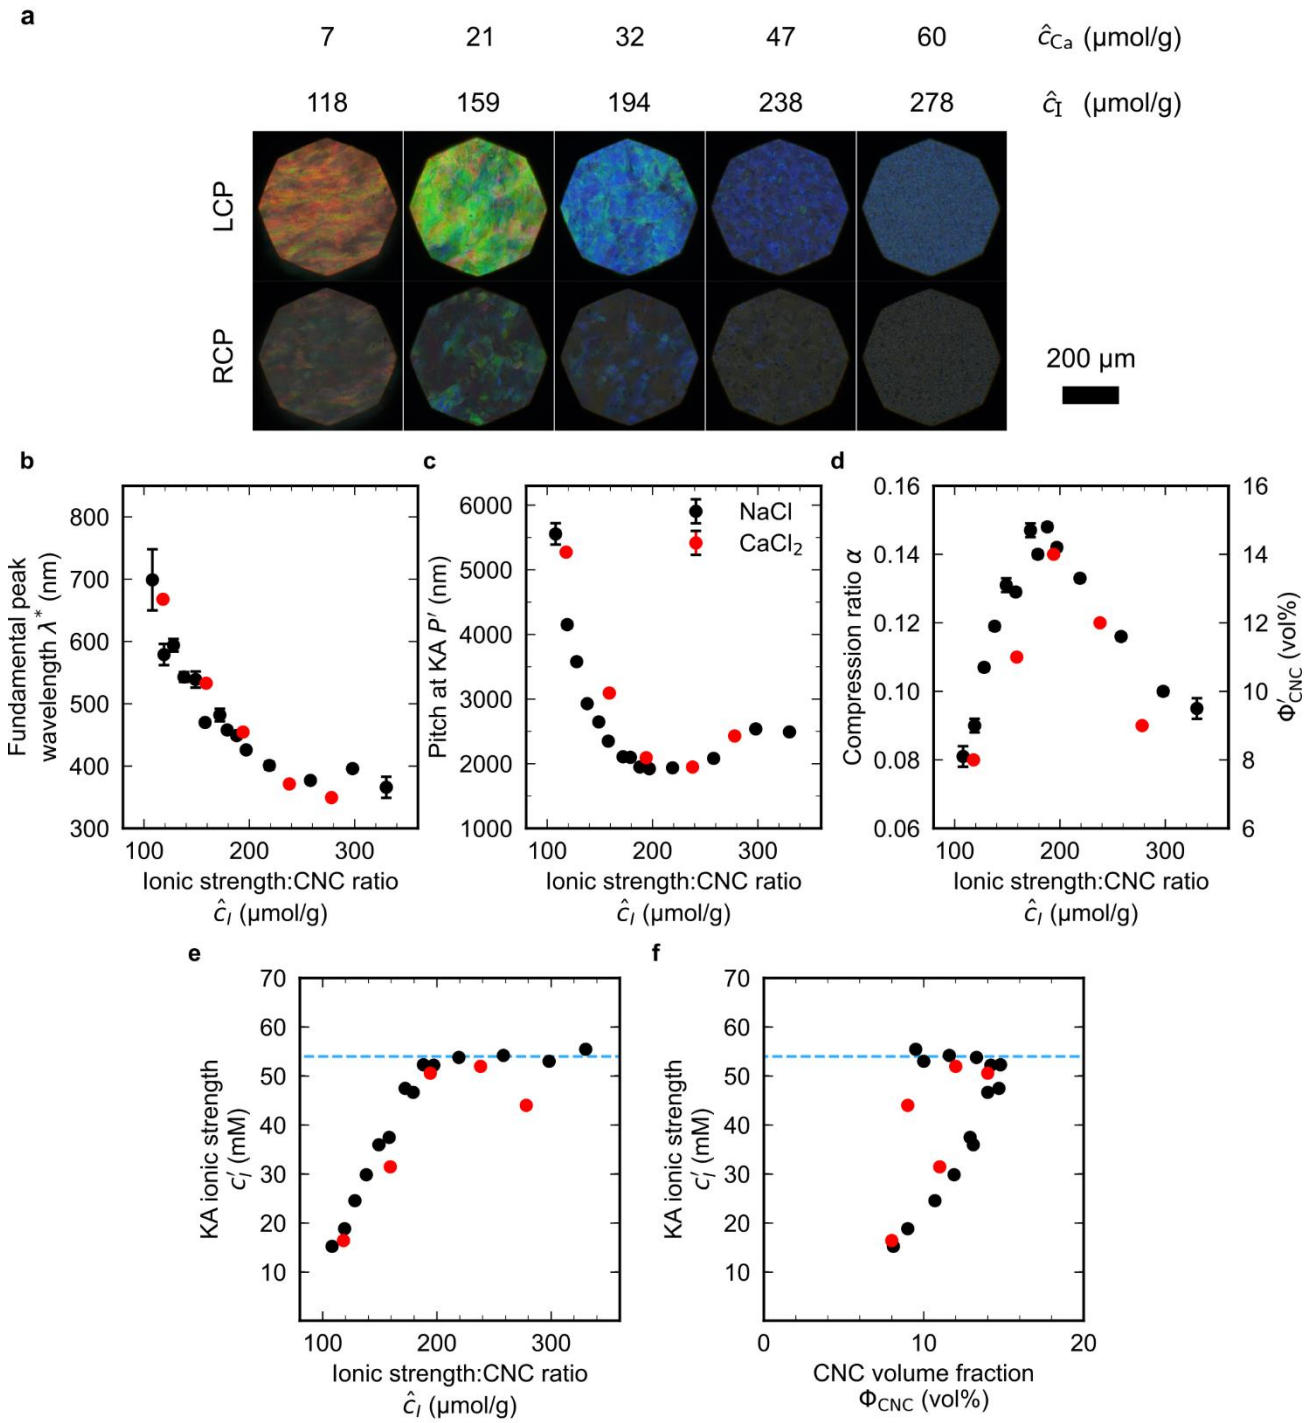

176 **Fig. S9** (a) POM images of photonic CNC films with increasing CaCl<sub>2</sub>:CNC ratio (expressed as  $\hat{c}_{Ca}$ , and as ionic strength  
 177 per CNC mass  $\hat{c}_I$ ). (b-d) AROS fitting parameters  $\lambda^*$ ,  $P'$ ,  $\alpha$  for H-CNC films with CaCl<sub>2</sub>. (red). The H-CNC NaCl series from  
 178 the main text (black) is also shown for comparison. (e) Ionic strength at KA,  $c'_I$ , versus  $\hat{c}_I$  (f)  $c'_I$  versus  $\Phi'_{CNC}$ . Blue dashed  
 179 lines correspond to  $c'_I = 54$  mM, as in the main text.

181 **S10 Rationalising the concurrent effects of added ions on CNC self-assembly**

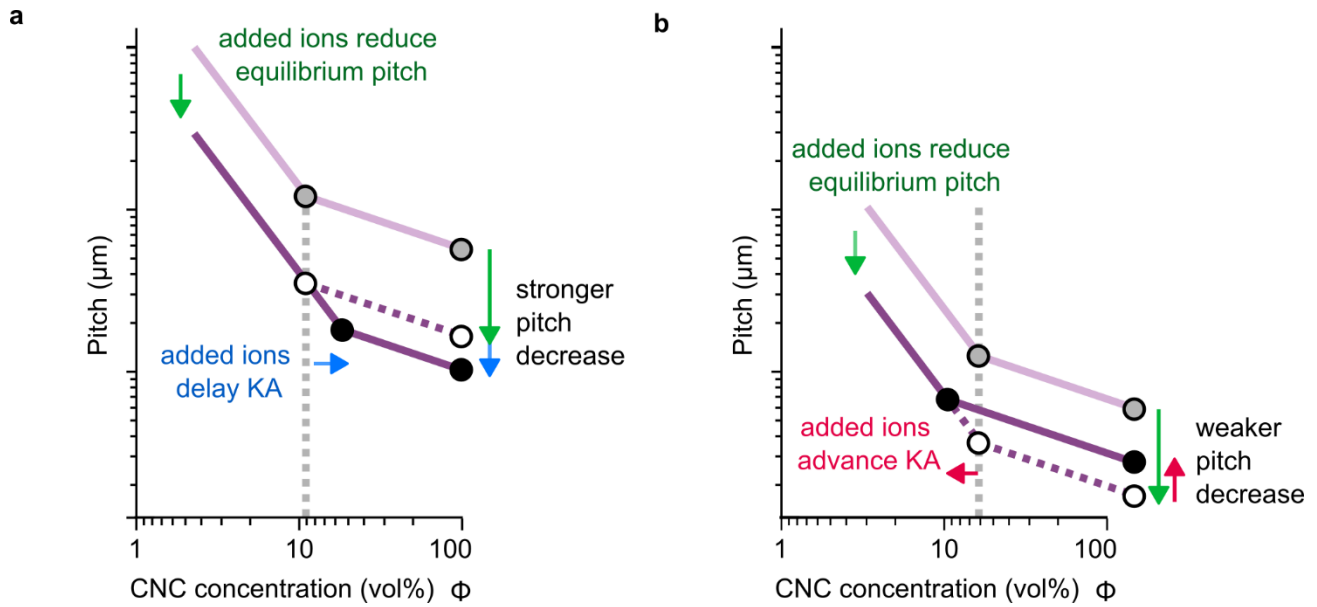

182

183 **Fig. S10** Rationalising the variation in  $\lambda^*$  with  $\hat{c}_{\text{NaCl}}$  by considering the concurrent effects of increasing ion-CNC ratio  $\hat{c}_{\text{NaCl}}$   
 184 on the pitch evolution for (a) low and (b) high  $\hat{c}_{\text{NaCl}}$  values. At low  $\hat{c}_{\text{NaCl}}$  values (a), increasing  $\hat{c}_{\text{NaCl}}$  is expected to both reduce  
 185 the equilibrium pitch at all concentrations (green arrow) and to delay KA (blue arrow), which lead to a strong reduction in  
 186 pitch. In contrast, at high  $\hat{c}_{\text{NaCl}}$  values (b), the earlier KA (red arrow) partially counter-acts the reduction in equilibrium pitch  
 187 with increasing  $\hat{c}_{\text{NaCl}}$ , leading to a weaker decrease in  $P''$  with  $\hat{c}_{\text{NaCl}}$ . This illustration assumes that in the pre-KA regime the  
 188 pitch decreases with a power-law dependence  $P(\Phi_{\text{CNC}}) \sim \Phi_{\text{CNC}}^{-\eta}$  with exponent  $\eta > 1$ , and in the post-KA regime the pitch  
 189 decreases according to  $P(\Phi_{\text{CNC}}) \sim \Phi_{\text{CNC}}^{-1}$ .

190

191

## 192 **S11 Modified compression model**

193 Consider a sample that consists of CNCs, water, additives dispersed in the CNC suspension (da),  
194 and additives that are not part of the CNC dispersion (na). In this case, one can define an *effective*  
195 CNC volume fraction considering only the dispersion, given by

$$196 \quad \tilde{\Phi}_{\text{CNC}} = \frac{V_{\text{CNC}}}{V_{\text{dis}}} = \frac{V_{\text{CNC}}}{V_{\text{CNC}} + V_{\text{wat}} + V_{\text{da}}} \quad (16)$$

197 The effective compression of the CNC dispersion upon drying is then given by

$$198 \quad \tilde{\alpha} = \frac{V_{\text{dis}}''}{V_{\text{dis}}'} = \frac{\tilde{\Phi}'_{\text{CNC}}}{\tilde{\Phi}''_{\text{CNC}}} \quad (17)$$

199 and is less than the macroscopic compression of the overall film (Eq. 2 of the main text). In terms of  
200 volume ratios, the overall and effective CNC volume fractions are then respectively given by

$$201 \quad \Phi_{\text{CNC}} = (1 + \nu_{\text{da}} + \nu_{\text{na}} + \nu_{\text{wat}})^{-1} \quad (18)$$

202 and

$$203 \quad \tilde{\Phi}_{\text{CNC}} = (1 + \nu_{\text{da}} + \nu_{\text{wat}})^{-1}, \quad (19)$$

204 while the overall and effective compression ratios are respectively given by

$$205 \quad \alpha = \frac{1 + \nu_{\text{da}}'' + \nu_{\text{na}}'' + \nu_{\text{wat}}''}{1 + \nu_{\text{da}}' + \nu_{\text{na}}' + \nu_{\text{wat}}'} \quad (20)$$

206 and

$$207 \quad \tilde{\alpha} = \frac{1 + \nu_{\text{da}}'' + \nu_{\text{wat}}''}{1 + \nu_{\text{da}}' + \nu_{\text{wat}}'}. \quad (21)$$

208 If the additive is fully dissolved at KA ( $\nu_{\text{na}} = 0$ ) then  $\tilde{\Phi}_j = \Phi_j$  and  $\tilde{\alpha} = \alpha$ , and the equations reduce  
209 to those for the reduced compression model (Eqs. 6 and 7 of the main text).

210 Fitting of AROS data is expected to yield the effective parameters  $\tilde{\alpha}$ ,  $P'$  and  $\lambda^* = nP'\tilde{\alpha}$ . However,  
211 these quantities cannot be immediately related to the equations above, as only the total user-defined  
212 additive:CNC ratio  $\nu_{\text{add}} = \nu_{\text{da}} + \nu_{\text{na}}$  is known *a priori*. It is possible to lift this uncertainty by assuming  
213 that  $\nu_{\text{da}}$  corresponds to the additive solubility, which is typically reported as  $\gamma_{\text{add}}^{(s)}$  (in mg/mL):



214 
$$\gamma_{\text{add}}^{(s)} = \frac{m_{\text{da}}}{V_{\text{sol}}} \quad (22)$$

215 which can be re-written in terms of volume ratios as

216 
$$\frac{1}{\gamma_{\text{add}}^{(s)}} = \frac{V_{\text{sol}}}{\rho_{\text{add}} V_{\text{da}}} = \frac{1}{\rho_{\text{add}}} \frac{v'_{\text{wat}} + v'_{\text{da}}}{v'_{\text{da}}}. \quad (23)$$

217 This equation can be re-arranged to obtain

218 
$$v'_{\text{wat}} = \left( \frac{\rho_{\text{add}}}{\gamma_{\text{add}}^{(s)}} - 1 \right) v'_{\text{da}}. \quad (24)$$

219 To make further progress, it can be assumed that KA occurs at a critical effective CNC volume fraction  
 220 (i.e. a similar assumption to that made in the reduced compression model, but using  $\tilde{\Phi}'_{\text{CNC}}$  rather  
 221 than  $\Phi'_{\text{CNC}}$ . If  $\tilde{\Phi}'_{\text{CNC}} = \tilde{\alpha}_0$ , where  $\tilde{\alpha}_0 = \alpha_0$  is the compression ratio for a no-additive film, then Eqs. 17  
 222 and 19 give

223 
$$\tilde{\alpha} = \frac{\alpha_0}{\tilde{\Phi}''_{\text{CNC}}} = \alpha_0 (1 + v_{\text{da}}) \quad (25)$$

224 where the superscript for  $v'_{\text{da}} = v''_{\text{da}}$  has been dropped for convenience. From Eq. 24, it can then be  
 225 shown that

226 
$$\frac{1}{\tilde{\alpha}_0} = 1 + v_{\text{da}} + v'_{\text{wat}} = 1 + \left( \frac{\rho_{\text{add}}}{\gamma_{\text{add}}^{(s)}} \right) v_{\text{da}}. \quad (26)$$

227 The effective compression ratio at high additive loadings reaches a saturation value  $\tilde{\alpha}_{\text{sat}}$  given by:

228 
$$\tilde{\alpha}_{\text{sat}} = \alpha_0 (1 + v_{\text{sat}}), \quad (27)$$

229 where

230 
$$v_{\text{sat}} = \frac{(1 - \alpha_0)}{\alpha_0} \left( \frac{\gamma_{\text{add}}^{(s)}}{\rho_{\text{add}}} \right), \quad (28)$$

231 Eq. 28 is valid for samples where  $\gamma_{\text{add}}^{(s)} < \gamma'_{\text{da}}$ . If the additive is entirely dispersed prior to KA  
 232 ( $\gamma_{\text{add}}^{(s)} > \gamma'_{\text{da}}$ ) then  $\tilde{\alpha} = \alpha$ . In the limit of an entirely insoluble additive ( $\gamma_{\text{add}}^{(s)} \rightarrow 0$ ),  $\tilde{\alpha}_{\text{sat}} \rightarrow \alpha_0$  as the  
 233 dispersion contains only CNCs and water.

234 **S12 Comparison of literature data for additive-induced red-shifts in photonic CNC**  
235 **films**

236 As shown above, if the additive only changes the compression of the structure after KA without  
237 changing the point of KA ( $\Phi'_{\text{CNC}}, P'$ ), the wavelength of peak reflection is expected to scale with the  
238 mass fraction of additive in the final film according to

239 
$$\lambda_{\text{peak}}(\mu_{\text{add}}) = \lambda_0 \left( 1 + \frac{\mu_{\text{add}}}{r_{\text{add}}} \right), \quad (29)$$

240 where  $\lambda_0$  is the wavelength of peak reflection without additives,  $\mu_{\text{add}}$  is the additive:CNC mass ratio  
241 and  $r_{\text{add}}$  is the additive:CNC density ratio

242 
$$r_{\text{add}} = \frac{\rho_{\text{add}}}{\rho_{\text{CNC}}}, \quad (30)$$

243 If a given additive reduces the final compression of the film upon drying without affecting the pitch or  
244 onset of KA, a plot of  $\lambda_{\text{peak}}$  versus  $\mu_{\text{add}}$  is expected to be linear, with slope  $\lambda_0/r_{\text{add}}$  and intercept  $\lambda_0$ .  
245 The density ratio should be an intrinsic property of the materials used, and consequently the  
246  $\lambda_{\text{peak}}(\mu_{\text{add}})$  given by Eq. 29 has only  $\lambda_0$  as a free fitting parameter.

247 **Fig. S11** shows  $\lambda_{\text{peak}}(\mu_{\text{add}})$  data for several neutral additives used to create composite photonic films  
248 in this work and previous studies. The spectroscopic methods vary between studies, and the method  
249 of extracting  $\lambda_{\text{peak}}(\mu_{\text{add}})$  is therefore summarised for each study in **Table S3**. The density values  
250 assumed for each additive, based on supplier data, are summarised in **Table S4**. For each dataset,  
251 a least-squares fitting to Eq. 29 as used to obtain  $\lambda_0$ , which allowed the datasets for each additive to  
252 be compared in terms of normalised wavelength  $\lambda_{\text{peak}}(\mu_{\text{add}})/\lambda_0$ . As can be seen in **Fig. S11**, a linear  
253 relationship describes the experimental data very well for most additives at low loadings ( $\mu_{\text{add}} < 0.8$ ,  
254 or up to approx. 40 wt% of additive in the final film), with the notable exception of PEG samples at  
255 high loadings.

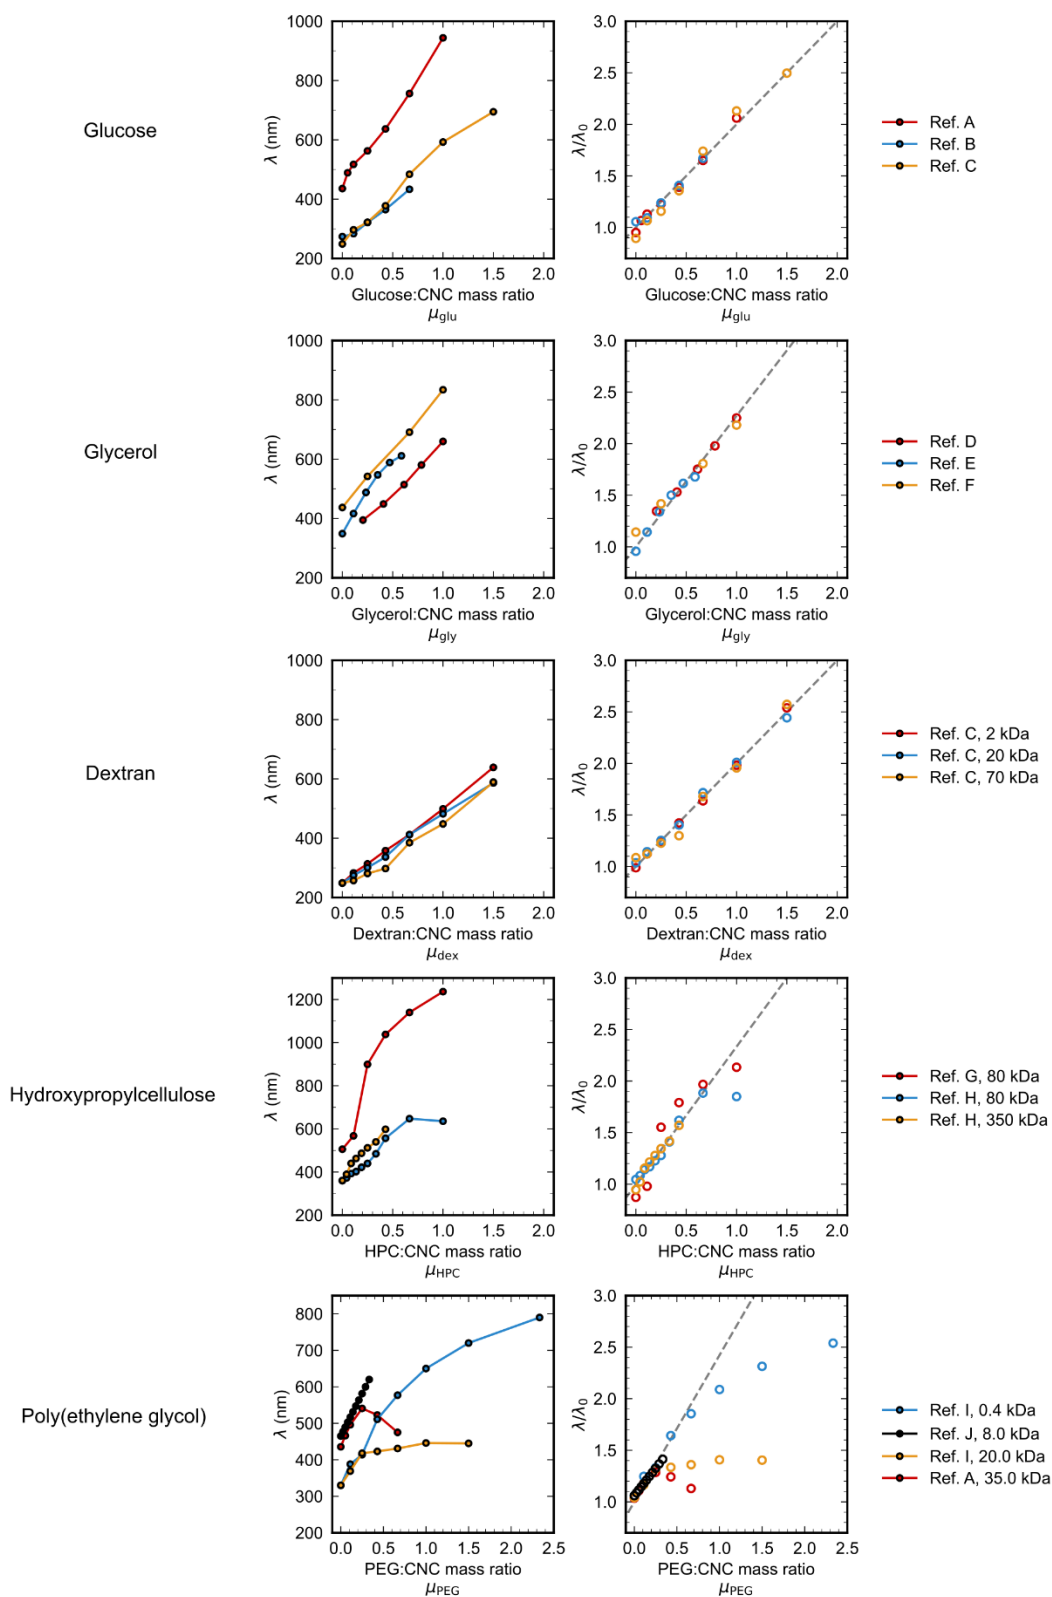

256

257 **Fig. S11** Variation in peak reflection wavelength with neutral additive concentration in photonic CNC films, comparing the  
 258 AROS data in this study with previous studies. For each additive, the data are displayed as peak wavelength  $\lambda$  versus  
 259 additive:CNC mass ratio  $\mu_{\text{add}}$  (left), or normalised wavelength  $\lambda/\lambda_0$  versus  $\mu_{\text{add}}$  (right). Grey dotted lines indicate fitting to  
 260 Eq. 29 using the parameters in **Table S3**. The legend shows reference letters corresponding to **Table S2**, and the molecular  
 261 weight of the macromolecular additives.

| Code | Reference     | Method of extracting $\lambda_{\text{peak}}(\mu_{\text{add}})$                          |
|------|---------------|-----------------------------------------------------------------------------------------|
| A    | This study    | Fitting of AROS tilt scan.                                                              |
| B    | <sup>3</sup>  | Local minimum of transmission spectrum ( $\theta_i = 0^\circ, \theta_o = 180^\circ$ ).  |
| C    | <sup>4</sup>  | Local minimum of transmission spectrum ( $\theta_i = 0^\circ, \theta_o = 180^\circ$ ).  |
| D    | <sup>5</sup>  | Maximum of specular reflection spectrum ( $\theta_i = 15^\circ, \theta_o = 15^\circ$ ). |
| E    | <sup>6</sup>  | Local maximum of extinction spectrum ( $\theta_i = 0^\circ, \theta_o = 180^\circ$ ).    |
| F    | <sup>7</sup>  | Maximum of reflection spectrum (experimental setup not specified).                      |
| G    | <sup>8</sup>  | Maximum of reflection spectrum (integrating sphere).                                    |
| H    | <sup>9</sup>  | Local minimum of transmission spectrum ( $\theta_i = 0^\circ, \theta_o = 180^\circ$ ).  |
| I    | <sup>10</sup> | Maximum of reflection spectrum (experimental setup not specified).                      |
| J    | <sup>11</sup> | Maximum of micro-scale reflection spectrum.                                             |

262 **Table S2** Sources of the data in **Fig. S11** (see section S13 for references) and brief description of the spectroscopic  
263 measurement.

264

| Species  | Density (g/cm <sup>3</sup> ) | $r_{\text{add}}$ | $n$                 |
|----------|------------------------------|------------------|---------------------|
| CNC      | 1.600                        | -                | 1.555 <sup>12</sup> |
| Glucose  | 1.600                        | 1.000            | 1.555               |
| PEG      | 1.125                        | 0.706            | 1.420               |
| Glycerol | 1.260                        | 0.788            | -                   |
| Dextran  | 1.600                        | 1.000            | -                   |
| HPC      | 1.300                        | 0.813            | -                   |

265 **Table S3** Density values assumed for each species and associated  $r_{\text{add}}$  values used for fitting curves in **Fig. S11**.

266

267

268

269

270

271 **S13 References**

- 272 1 T. G. Parton, R. M. Parker, G. T. van de Kerkhof, A. Narkevicius, J. S. Haataja, B. Frka-Petescic  
273 and S. Vignolini, *Nat Commun*, 2022, **13**, 2657.
- 274 2 T. Wagner and H.-G. Lipinski, *Journal of Open Research Software*, 2013, **1**, e6.
- 275 3 Z. Yu, K. Wang and X. Lu, *Int. J. Biol. Macromol.*, 2021, **188**, 385–390.
- 276 4 Y. Meng, Z. Long, Z. He, X. Fu and C. Dong, *Biomacromolecules*, 2021, **22**, 4479–4488.
- 277 5 X. Dong, D. Li, J.-M. Wu, Z.-L. Zhang, Z.-L. Wang, F. Song, X.-L. Wang and Y.-Z. Wang, *ACS*  
278 *Sustainable Chem. Eng.*, 2022, **10**, 10641–10648.
- 279 6 Y.-D. He, Z.-L. Zhang, J. Xue, X.-H. Wang, F. Song, X.-L. Wang, L.-L. Zhu and Y.-Z. Wang, *ACS*  
280 *Appl. Mater. Interfaces*, 2018, **10**, 5805–5811.
- 281 7 M. Xu, W. Li, C. Ma, H. Yu, Y. Wu, Y. Wang, Z. Chen, J. Li and S. Liu, *J. Mater. Chem. C*, 2018,  
282 **6**, 5391–5400.
- 283 8 D. V. Saraiva, R. Chagas, B. M. de Abreu, C. N. Gouveia, P. E. S. Silva, M. H. Godinho and S. N.  
284 Fernandes, *Crystals*, 2020, **10**, 122.
- 285 9 C. M. Walters, C. E. Boott, T. D. Nguyen, W. Y. Hamad and M. J. MacLachlan, *Biomacromolecules*,  
286 2020, **21**, 1295–1302.
- 287 10 Y. Qi, S. Wang, J. Sun, J. Song, H. Li and J. Guo, *International Journal of Biological*  
288 *Macromolecules*, 2024, **260**, 129544.
- 289 11 C. A. Williams, R. M. Parker, A. Kyriacou, M. Murace and S. Vignolini, *Adv. Mater.*, 2023, **36**,  
290 2307563.
- 291 12 A. G. Dumanli, H. M. van der Kooij, G. Kamita, E. Reisner, J. J. Baumberg, U. Steiner and S.  
292 Vignolini, *ACS Appl. Mater. Interfaces*, 2014, **6**, 12302–12306.
- 293
